# Supplementary material
Source: PubMed Central journal article supplement (PMC6211810)
Supplement: NIHMS1507078-supplement-Supplemental_Material.pdf [file NIHMS1507078-supplement-Supplemental_Material.pdf]

**Cardioembolic Stroke Risk and Recovery after  
Anticoagulation-Related Intracerebral Hemorrhage**

**SUPPLEMENTARY MATERIAL**

Supplementary Table I                      Page 2

Supplementary Table II                     Page 3

## Supplemental Table I. Patient Characteristics by Study and Oral Anticoagulation

Resumption Status (n = 941)

| Variable                                            | RETRACE              |                      | MGH                  |                      | ERICH               |                      |
|-----------------------------------------------------|----------------------|----------------------|----------------------|----------------------|---------------------|----------------------|
|                                                     | OAT Resumption       | No OAT Resumption    | OAT Resumption       | No OAT Resumption    | OAT Resumption      | No OAT Resumption    |
| No. of Individuals                                  | 131                  | 323                  | 86                   | 174                  | 45                  | 182                  |
| Age*                                                | 72.9 (8.1)           | 74.0 (7.6)           | 71.6 (8.8)           | 72.8 (10.1)          | 70.5 (10.6)         | 71.5 (11.6)          |
| Sex (female)                                        | 46 (35)              | 132 (41)             | 36 (42)              | 67 (39)              | 15 (33)             | 50 (27)              |
| CHA <sub>2</sub> DS <sub>2</sub> -VASc <sup>+</sup> | 5 (4 – 6)            | 5 (4 – 6)            | 5 (4 – 6)            | 5 (4 – 6)            | 5 (4 – 6)           | 5 (4 – 6)            |
| ICH Location                                        |                      |                      |                      |                      |                     |                      |
| - Lobar                                             | 40 (31)              | 151 (47)             | 27 (32)              | 91 (53)              | 14 (31)             | 69 (38)              |
| - Non-lobar                                         | 91 (69)              | 172 (53)             | 59 (68)              | 83 (47)              | 31 (69)             | 113 (62)             |
| ICH Volume <sup>+</sup>                             | 10.8<br>(3.2 – 23.6) | 11.2<br>(3.3 – 22.9) | 11.3<br>(2.9 – 22.5) | 12.1<br>(3.6 – 23.1) | 9.7<br>(2.4 – 24.1) | 10.4<br>(3.1 – 22.7) |
| Discharge mRS <sup>+</sup>                          | 4 (3 – 5)            | 4 (3 – 5)            | 4 (3 – 5)            | 4 (3 – 5)            | 4 (3 – 5)           | 4 (3 – 5)            |
| Antiplatelet Agents                                 | 9 (7)                | 209 (65)             | 6 (7)                | 103 (59)             | 5 (11)              | 66 (36)              |

All analyses adjusted for discharge modified Rankin scale.

Abbreviations: mRS = modified Rankin Scale, OAT = Oral Anticoagulation Treatment

**Supplemental Table II. Interaction analysis of the effects of CHA<sub>2</sub>DS<sub>2</sub>-VASc Score and OAT Resumption on Functional Recovery and Modified Rankin Scale at One Year after Intracerebral Hemorrhage**

| Variable                                                                     | Functional Recovery*<br>(at 1 Year) | mRS change**<br>(at 1 Year) |
|------------------------------------------------------------------------------|-------------------------------------|-----------------------------|
|                                                                              | p                                   | p                           |
| CHA <sub>2</sub> DS <sub>2</sub> -VASc Score<br>(for 1 point increase)       | 0.004                               | 0.003                       |
| OAT Resumption                                                               | 0.007                               | 0.007                       |
| Interaction:<br>- CHA <sub>2</sub> DS <sub>2</sub> -VASc<br>- OAT resumption | 0.011                               | 0.019                       |

All analyses adjusted for discharge modified Rankin scale, ICH location, and exposure to antiplatelet agents.

\* defined as achieving mRS ≤3 if mRS > 3 at discharge

\*\* difference in mRS score between one-year follow-up and discharge, effect size calculated for one-point decrease in mRS

Abbreviations: 95% CI = 95% Confidence Interval, mRS = modified Rankin Scale, OAT = Oral Anticoagulation Treatment, OR = Odds Ratio, SE = Standard Error
